# Supplementary material
Source: PubMed Central journal article supplement (PMC4612436)
Supplement: NIHMS65373-supplement-1.pdf [file NIHMS65373-supplement-1.pdf]

## Supplementary Information

### **An integrated experimental and quantum-chemical investigation on the vibrational spectra of chlorofluoromethane**

Andrea Pietropolli Charmet<sup>1</sup>, Paolo Stoppa<sup>1</sup>, Nicola Tasinato<sup>1</sup>, Santi Giorgianni<sup>1</sup>,

Vincenzo Barone<sup>2,3</sup>, Malgorzata Biczysko<sup>2</sup>, Julien Bloino<sup>2,4</sup>, Chiara Cappelli<sup>2,5</sup>, Ivan Carnimeo<sup>2,3,5</sup>

Cristina Puzzarini<sup>6</sup>

<sup>1</sup>*Dipartimento di Scienze Molecolari e Nanosistemi, Università Ca' Foscari Venezia, Calle Larga S. Marta 2137, I-30123 Venezia, Italy*

<sup>2</sup>*Scuola Normale Superiore, Piazza dei Cavalieri 7, 56126 Pisa, Italy*

<sup>3</sup>*Istituto Nazionale di Fisica Nucleare (INFN), Sezione di Pisa, Polo Fibonacci Largo B. Pontecorvo 3, I-56127 Pisa, Italy*

<sup>4</sup>*Consiglio Nazionale delle Ricerche, Istituto di Chimica dei Composti OrganoMetallici (CNR-ICCOM), Area della Ricerca CNR di Pisa, Via G. Moruzzi 1, I-56124 Pisa, Italy*

<sup>5</sup>*Universita' di Pisa, Dipartimento di Chimica e Chimica Industriale, Via Risorgimento 35, I-56126 Pisa, Italy*

<sup>6</sup>*Dipartimento di Chimica "Giacomo Ciamician", Università di Bologna, Via F. Selmi, 2, 40126 Bologna, Italy*

Author E-mail address: jacpnike@unive.it

Harmonic intensities predicted at CCSD(T) level of theory and with different basis sets is shown in Table **S.I**. A list of the observed band types for some of the assigned bands is listed in Table **S.II**. Sextic centrifugal-distortion terms computed at CCSD(T) level of theory employing different basis sets are listed in Table **S.III**. Vibration-rotation interaction constants and relevant Coriolis zeta parameters (computed by CFOUR program) are shown in Tables **S.IV-S.VIII** and **S.IX-S.XIII**, respectively.

**Table S.I** Harmonic intensities (km/mol) of CH<sub>2</sub><sup>35</sup>ClF evaluated at the CCSD(T) level of theory and employing different basis sets.

|            | cc-pCVTZ<br>(fc) | cc-pCVTZ<br>(all) | cc-pVQZ<br>(fc) | aug-cc-pVQZ<br>(fc) | cc-pV5Z<br>(fc) | cc-pV5Z +<br>CV <sup>a</sup> | cc-pV5Z +<br>CV + aug <sup>b</sup> |
|------------|------------------|-------------------|-----------------|---------------------|-----------------|------------------------------|------------------------------------|
| $\omega_1$ | 23.23            | 22.94             | 19.83           | 18.24               | 18.95           | 18.66                        | 17.06                              |
| $\omega_2$ | 0.05             | 0.06              | 0.09            | 0.17                | 0.07            | 0.08                         | 0.15                               |
| $\omega_3$ | 36.58            | 35.76             | 33.19           | 30.95               | 32.21           | 31.39                        | 29.16                              |
| $\omega_4$ | 157.74           | 157.42            | 159.66          | 162.70              | 162.86          | 162.54                       | 165.57                             |
| $\omega_5$ | 82.41            | 81.89             | 85.03           | 84.97               | 85.12           | 84.6                         | 84.54                              |
| $\omega_6$ | 1.33             | 1.34              | 1.37            | 1.43                | 1.43            | 1.44                         | 1.50                               |
| $\omega_7$ | 9.51             | 9.20              | 6.14            | 4.46                | 4.99            | 4.68                         | 3.01                               |
| $\omega_8$ | 2.65             | 2.62              | 2.52            | 2.46                | 2.57            | 2.54                         | 2.47                               |
| $\omega_9$ | 0.77             | 0.74              | 0.68            | 0.52                | 0.58            | 0.55                         | 0.38                               |

<sup>a</sup> CV effects evaluated by employing the cc-pCVTZ basis set (see text).

<sup>b</sup> The effects of diffuse function were evaluated by employing the aug-cc-pVQZ basis set (see text).

**Table S.II** Summary of observed band types for some of the assigned bands of CH<sub>2</sub>ClF.

| Band            | Observed band type | Band                    | Observed band type |
|-----------------|--------------------|-------------------------|--------------------|
| $\nu_6$         | mainly <i>b</i>    | $\nu_3 + 2\nu_4$        | <i>a/b</i>         |
| $\nu_5$         | mainly <i>a</i>    | $\nu_7 + \nu_5$         | <i>c</i>           |
| $\nu_9$         | <i>c</i>           | $\nu_1 + \nu_9$         | <i>c</i>           |
| $\nu_4$         | <i>a/b</i>         | $\nu_7 + \nu_9$         | <i>a/b</i>         |
| $\nu_5 + \nu_6$ | <i>a/b</i>         | $\nu_4 + \nu_7$         | <i>c</i>           |
| $\nu_8$         | <i>c</i>           | $\nu_1 + \nu_8$         | <i>c</i>           |
| $\nu_3$         | <i>a/b</i>         | $\nu_7 + \nu_8$         | <i>a/b</i>         |
| $\nu_2$         | mainly <i>b</i>    | $\nu_1 + \nu_3$         | <i>a/b</i>         |
| $2\nu_5$        | <i>a/b</i>         | $\nu_3 + \nu_7$         | <i>c</i>           |
| $\nu_4 + \nu_5$ | <i>a/b</i>         | $\nu_2 + \nu_7$         | <i>c</i>           |
| $\nu_2 + \nu_6$ | <i>a/b</i>         | $\nu_6 + \nu_7 + \nu_8$ | <i>a/b</i>         |
| $2\nu_9$        | <i>c</i>           | $\nu_5 + \nu_7 + \nu_9$ | <i>a/b</i>         |
| $\nu_3 + \nu_5$ | <i>a/b</i>         | $\nu_5 + \nu_7 + \nu_8$ | <i>a/b</i>         |
| $2\nu_4$        | <i>a/b</i>         | $\nu_7 + 2\nu_9$        | <i>c</i>           |
| $\nu_2 + \nu_5$ | <i>a/b</i>         | $2\nu_4 + \nu_7$        | <i>c</i>           |
| $\nu_8 + \nu_9$ | <i>a/b</i>         | $\nu_4 + \nu_7 + \nu_8$ | <i>a/b</i>         |
| $\nu_4 + \nu_8$ | <i>c</i>           | $\nu_3 + \nu_7 + \nu_9$ | <i>a/b</i>         |
| $\nu_3 + \nu_4$ | <i>a/b</i>         | $\nu_3 + \nu_4 + \nu_7$ | <i>c</i>           |
| $2\nu_8$        | <i>a/b</i>         | $\nu_7 + 2\nu_8$        | <i>c</i>           |
| $2\nu_3$        | mainly <i>b</i>    | $\nu_3 + \nu_7 + \nu_8$ | <i>a/b</i>         |
| $\nu_2 + \nu_3$ | <i>a/b</i>         | $2\nu_3 + \nu_7$        | <i>c</i>           |
| $2\nu_2$        | mainly <i>b</i>    | $2\nu_1$                | mainly <i>a</i>    |
| $\nu_1$         | mainly <i>b</i>    | $2\nu_2 + \nu_7$        | <i>c</i>           |
| $\nu_7$         | <i>c</i>           | $2\nu_7$                | mainly <i>b</i>    |
| $3\nu_4$        | <i>a/b</i>         |                         |                    |

**Table S.III** Sextic centrifugal-distortion constants (in kHz) of CH<sub>2</sub><sup>35</sup>ClF as computed by anharmonic force fields at the CCSD(T) level of theory employing different basis sets. The experimental data are also reported. <sup>a</sup>

|             | cc-pVQZ                    | cc-pVQZ + CV <sup>b</sup>  | cc-pVQZ + CV <sup>a</sup> + aug <sup>c</sup> | Expt. <sup>d</sup>           |
|-------------|----------------------------|----------------------------|----------------------------------------------|------------------------------|
| $\Phi_J$    | 2.81640 × 10 <sup>-6</sup> | 2.82370 × 10 <sup>-6</sup> | 2.92310 × 10 <sup>-6</sup>                   | 2.868(45) × 10 <sup>-6</sup> |
| $\Phi_{JK}$ | 4.21100 × 10 <sup>-5</sup> | 4.20115 × 10 <sup>-5</sup> | 4.12793 × 10 <sup>-5</sup>                   | 1.83(29) × 10 <sup>-5</sup>  |
| $\Phi_{KJ}$ | -0.00280                   | -0.00281                   | -0.00278                                     | -0.002746(16)                |
| $\Phi_K$    | 0.02573                    | 0.02580                    | 0.02510                                      | 0.02552(22)                  |
| $\phi_J$    | 1.07340 × 10 <sup>-6</sup> | 1.07550 × 10 <sup>-6</sup> | 1.11310 × 10 <sup>-6</sup>                   | 1.055(10) × 10 <sup>-6</sup> |
| $\phi_{JK}$ | 1.90462 × 10 <sup>-5</sup> | 1.90651 × 10 <sup>-5</sup> | 1.95169 × 10 <sup>-5</sup>                   | 4.03(29) × 10 <sup>-5</sup>  |
| $\phi_K$    | 0.00318                    | 0.00318                    | 0.00318                                      | 0.00115(27)                  |

<sup>a</sup> All the values (experimental and computed) reported in the Table refer to the Watson's A-reduced Hamiltonian in the  $\Gamma$  representation.

<sup>b</sup> CV effects evaluated by employing the cc-pCVTZ basis set (see text).

<sup>c</sup> The effects of diffuse functions have been evaluated by employing the aug-cc-pVTZ basis set (see text).

<sup>d</sup> Standard deviations in units of the last significant digits are given in parentheses. Data taken from S. Blanco, A. Lesarri, J. C. Lopez, J. L. Alonso and A. Guarnieri, *J. Mol. Spectrosc.* **174**, 397 (1995).

**Table S.IV** Vibration-rotation interaction constants at CCSD(T, fc)/cc-pVTZ

| AXIS | MODE | VIB-ROT CONSTANT / (cm-1) |            |            | TOTAL      |
|------|------|---------------------------|------------|------------|------------|
|      |      | CORIOLIS                  | QUADRATIC  | ANHARMONIC |            |
| 1    | 6    | 0.0004788                 | -0.0037940 | -0.0050054 | -0.0083205 |
| 1    | 5    | 0.0017761                 | -0.0046908 | 0.0047418  | 0.0018271  |
| 1    | 9    | 0.0074374                 | -0.0000467 | -0.0016043 | 0.0057864  |
| 1    | 4    | -0.0041199                | -0.0049464 | 0.0147072  | 0.0056410  |
| 1    | 8    | -0.0004726                | -0.0001159 | 0.0086280  | 0.0080395  |
| 1    | 3    | 0.0000313                 | -0.0002202 | 0.0041131  | 0.0039242  |
| 1    | 2    | 0.0052372                 | -0.0000082 | -0.0007735 | 0.0044556  |
| 1    | 1    | -0.0033659                | -0.0007163 | 0.0081222  | 0.0040400  |
| 1    | 2    | -0.0054505                | -0.0000004 | 0.0076794  | 0.0022285  |
| 2    | 6    | 0.0000050                 | -0.0004584 | 0.0006957  | 0.0002423  |
| 2    | 5    | 0.0000518                 | -0.0001508 | 0.0011671  | 0.0010682  |
| 2    | 9    | 0.0001558                 | -0.0000015 | 0.0003628  | 0.0005171  |
| 2    | 4    | -0.0000741                | -0.0000604 | 0.0005243  | 0.0003899  |
| 2    | 8    | 0.0002153                 | -0.0000005 | -0.0002854 | -0.0000705 |
| 2    | 3    | -0.0000614                | -0.0000110 | 0.0000953  | 0.0000230  |
| 2    | 2    | -0.0001477                | -0.0000005 | 0.0001974  | 0.0000493  |
| 2    | 1    | -0.0000576                | -0.0000009 | -0.0000383 | -0.0000969 |
| 2    | 2    | -0.0000646                | -0.0000003 | -0.0001414 | -0.0002063 |
| 3    | 6    | 0.0001303                 | -0.0002476 | 0.0005004  | 0.0003832  |
| 3    | 5    | 0.0001356                 | -0.0000641 | 0.0010301  | 0.0011016  |
| 3    | 9    | 0.0002782                 | -0.0000071 | 0.0003510  | 0.0006221  |
| 3    | 4    | -0.0002385                | -0.0000274 | 0.0006445  | 0.0003786  |
| 3    | 8    | -0.0002557                | -0.0000146 | -0.0000593 | -0.0003296 |
| 3    | 3    | 0.0006196                 | 0.0000000  | 0.0001638  | 0.0007834  |
| 3    | 2    | -0.0005990                | -0.0000011 | 0.0001475  | -0.0004527 |
| 3    | 1    | -0.0000240                | -0.0000001 | -0.0000807 | -0.0001048 |
| 3    | 2    | -0.0000182                | -0.0000003 | -0.0001446 | -0.0001632 |

**Table S.V** Vibration-rotation interaction constants obtained at CCSD(T, fc)/aug-cc-pVTZ

| AXIS | MODE | VIB-ROT CONSTANT / (cm-1) |            |            | TOTAL      |
|------|------|---------------------------|------------|------------|------------|
|      |      | CORIOLIS                  | QUADRATIC  | ANHARMONIC |            |
| 1    | 6    | 0.0004695                 | -0.0037541 | -0.0048647 | -0.0081494 |
| 1    | 5    | 0.0016787                 | -0.0045463 | 0.0047932  | 0.0019256  |
| 1    | 9    | 0.0099194                 | -0.0000424 | -0.0016409 | 0.0082361  |
| 1    | 4    | -0.0067809                | -0.0050103 | 0.0149287  | 0.0031376  |
| 1    | 8    | -0.0002530                | -0.0001182 | 0.0087230  | 0.0083519  |
| 1    | 3    | -0.0000101                | -0.0002347 | 0.0044145  | 0.0041697  |
| 1    | 2    | 0.0051673                 | -0.0000083 | -0.0008410 | 0.0043179  |
| 1    | 1    | -0.0033153                | -0.0006983 | 0.0079271  | 0.0039135  |
| 1    | 2    | -0.0053477                | -0.0000004 | 0.0073927  | 0.0020445  |
| 2    | 6    | 0.0000051                 | -0.0004615 | 0.0006914  | 0.0002350  |
| 2    | 5    | 0.0000532                 | -0.0001524 | 0.0011757  | 0.0010765  |
| 2    | 9    | 0.0001988                 | -0.0000016 | 0.0003691  | 0.0005664  |
| 2    | 4    | -0.0001258                | -0.0000606 | 0.0005322  | 0.0003457  |
| 2    | 8    | 0.0002031                 | -0.0000005 | -0.0003019 | -0.0000993 |
| 2    | 3    | -0.0000402                | -0.0000115 | 0.0000640  | 0.0000124  |
| 2    | 2    | -0.0001482                | -0.0000004 | 0.0002116  | 0.0000630  |
| 2    | 1    | -0.0000582                | -0.0000009 | -0.0000353 | -0.0000944 |
| 2    | 2    | -0.0000650                | -0.0000003 | -0.0001384 | -0.0002038 |
| 3    | 6    | 0.0001326                 | -0.0002478 | 0.0004963  | 0.0003811  |
| 3    | 5    | 0.0001468                 | -0.0000636 | 0.0010370  | 0.0011202  |
| 3    | 9    | 0.0002932                 | -0.0000067 | 0.0003547  | 0.0006413  |
| 3    | 4    | -0.0002517                | -0.0000287 | 0.0006573  | 0.0003769  |
| 3    | 8    | -0.0002710                | -0.0000150 | -0.0000671 | -0.0003531 |
| 3    | 3    | 0.0006126                 | 0.0000000  | 0.0001453  | 0.0007579  |
| 3    | 2    | -0.0005930                | -0.0000013 | 0.0001579  | -0.0004364 |
| 3    | 1    | -0.0000237                | -0.0000001 | -0.0000793 | -0.0001031 |
| 3    | 2    | -0.0000181                | -0.0000003 | -0.0001451 | -0.0001635 |

**Table S.VI** Vibration-rotation interaction constants obtained at CCSD(T, fc)/cc-pVQZ

| AXIS | MODE | VIB-ROT CONSTANT / (cm-1) |            |            | TOTAL      |
|------|------|---------------------------|------------|------------|------------|
|      |      | CORIOLIS                  | QUADRATIC  | ANHARMONIC |            |
| 1    | 6    | 0.0004795                 | -0.0038042 | -0.0049480 | -0.0082727 |
| 1    | 5    | 0.0017631                 | -0.0045878 | 0.0046739  | 0.0018491  |
| 1    | 9    | 0.0086496                 | -0.0000454 | -0.0016696 | 0.0069346  |
| 1    | 4    | -0.0054466                | -0.0050193 | 0.0148094  | 0.0043436  |
| 1    | 8    | -0.0003300                | -0.0001177 | 0.0086881  | 0.0082404  |
| 1    | 3    | 0.0000112                 | -0.0002356 | 0.0043406  | 0.0041163  |
| 1    | 2    | 0.0052153                 | -0.0000096 | -0.0007583 | 0.0044475  |
| 1    | 1    | -0.0033605                | -0.0007147 | 0.0080617  | 0.0039864  |
| 1    | 2    | -0.0054308                | -0.0000004 | 0.0075352  | 0.0021040  |
| 2    | 6    | 0.0000051                 | -0.0004623 | 0.0006892  | 0.0002319  |
| 2    | 5    | 0.0000541                 | -0.0001526 | 0.0011753  | 0.0010768  |
| 2    | 9    | 0.0001774                 | -0.0000015 | 0.0003518  | 0.0005276  |
| 2    | 4    | -0.0001001                | -0.0000607 | 0.0005313  | 0.0003704  |
| 2    | 8    | 0.0002171                 | -0.0000005 | -0.0002988 | -0.0000821 |
| 2    | 3    | -0.0000541                | -0.0000114 | 0.0000661  | 0.0000006  |
| 2    | 2    | -0.0001527                | -0.0000004 | 0.0001942  | 0.0000411  |
| 2    | 1    | -0.0000584                | -0.0000009 | -0.0000421 | -0.0001014 |
| 2    | 2    | -0.0000654                | -0.0000003 | -0.0001419 | -0.0002075 |
| 3    | 6    | 0.0001326                 | -0.0002486 | 0.0004944  | 0.0003783  |
| 3    | 5    | 0.0001455                 | -0.0000641 | 0.0010353  | 0.0011168  |
| 3    | 9    | 0.0002866                 | -0.0000070 | 0.0003415  | 0.0006211  |
| 3    | 4    | -0.0002501                | -0.0000285 | 0.0006535  | 0.0003749  |
| 3    | 8    | -0.0002640                | -0.0000149 | -0.0000670 | -0.0003459 |
| 3    | 3    | 0.0006365                 | 0.0000000  | 0.0001447  | 0.0007812  |
| 3    | 2    | -0.0006164                | -0.0000012 | 0.0001440  | -0.0004737 |
| 3    | 1    | -0.0000242                | -0.0000001 | -0.0000846 | -0.0001090 |
| 3    | 2    | -0.0000184                | -0.0000003 | -0.0001471 | -0.0001658 |



**Table S.VII** Vibration-rotation interaction constants obtained at CCSD(T, fc)/cc-pCVTZ

| AXIS | MODE | VIB-ROT CONSTANT / (cm-1) |            |            | TOTAL      |
|------|------|---------------------------|------------|------------|------------|
|      |      | CORIOLIS                  | QUADRATIC  | ANHARMONIC |            |
| 1    | 6    | 0.0004820                 | -0.0038059 | -0.0050175 | -0.0083414 |
| 1    | 5    | 0.0017926                 | -0.0046918 | 0.0047211  | 0.0018220  |
| 1    | 9    | 0.0076746                 | -0.0000465 | -0.0016467 | 0.0059815  |
| 1    | 4    | -0.0043979                | -0.0049598 | 0.0147922  | 0.0054346  |
| 1    | 8    | -0.0004361                | -0.0001165 | 0.0086470  | 0.0080944  |
| 1    | 3    | 0.0000263                 | -0.0002218 | 0.0041473  | 0.0039517  |
| 1    | 2    | 0.0052576                 | -0.0000083 | -0.0007890 | 0.0044602  |
| 1    | 1    | -0.0033730                | -0.0007196 | 0.0081286  | 0.0040359  |
| 1    | 2    | -0.0054752                | -0.0000004 | 0.0076294  | 0.0021539  |
| 2    | 6    | 0.0000050                 | -0.0004597 | 0.0006976  | 0.0002429  |
| 2    | 5    | 0.0000523                 | -0.0001512 | 0.0011688  | 0.0010699  |
| 2    | 9    | 0.0001610                 | -0.0000015 | 0.0003598  | 0.0005192  |
| 2    | 4    | -0.0000796                | -0.0000610 | 0.0005280  | 0.0003874  |
| 2    | 8    | 0.0002167                 | -0.0000005 | -0.0002867 | -0.0000705 |
| 2    | 3    | -0.0000606                | -0.0000110 | 0.0000901  | 0.0000186  |
| 2    | 2    | -0.0001491                | -0.0000005 | 0.0001972  | 0.0000476  |
| 2    | 1    | -0.0000580                | -0.0000009 | -0.0000399 | -0.0000988 |
| 2    | 2    | -0.0000650                | -0.0000003 | -0.0001421 | -0.0002074 |
| 3    | 6    | 0.0001313                 | -0.0002480 | 0.0005013  | 0.0003846  |
| 3    | 5    | 0.0001383                 | -0.0000644 | 0.0010311  | 0.0011050  |
| 3    | 9    | 0.0002799                 | -0.0000071 | 0.0003481  | 0.0006209  |
| 3    | 4    | -0.0002421                | -0.0000277 | 0.0006493  | 0.0003795  |
| 3    | 8    | -0.0002572                | -0.0000147 | -0.0000594 | -0.0003313 |
| 3    | 3    | 0.0006222                 | 0.0000000  | 0.0001602  | 0.0007825  |
| 3    | 2    | -0.0006014                | -0.0000012 | 0.0001473  | -0.0004553 |
| 3    | 1    | -0.0000243                | -0.0000001 | -0.0000824 | -0.0001068 |
| 3    | 2    | -0.0000184                | -0.0000003 | -0.0001463 | -0.0001651 |

**Table S.VIII** Vibration-rotation interaction constants obtained at CCSD(T, all)/cc-pCVTZ

| AXIS | MODE | VIB-ROT CONSTANT / (cm-1) |            |            | TOTAL      |
|------|------|---------------------------|------------|------------|------------|
|      |      | CORIOLIS                  | QUADRATIC  | ANHARMONIC |            |
| 1    | 6    | 0.0004849                 | -0.0038202 | -0.0050261 | -0.0083614 |
| 1    | 5    | 0.0018123                 | -0.0047074 | 0.0047336  | 0.0018385  |
| 1    | 9    | 0.0076875                 | -0.0000464 | -0.0016744 | 0.0059667  |
| 1    | 4    | -0.0044184                | -0.0049704 | 0.0148545  | 0.0054657  |
| 1    | 8    | -0.0004285                | -0.0001172 | 0.0086699  | 0.0081242  |
| 1    | 3    | 0.0000259                 | -0.0002231 | 0.0041600  | 0.0039628  |
| 1    | 2    | 0.0052757                 | -0.0000084 | -0.0007951 | 0.0044722  |
| 1    | 1    | -0.0033811                | -0.0007229 | 0.0081578  | 0.0040538  |
| 1    | 2    | -0.0055013                | -0.0000004 | 0.0076577  | 0.0021560  |
| 2    | 6    | 0.0000050                 | -0.0004608 | 0.0006984  | 0.0002426  |
| 2    | 5    | 0.0000527                 | -0.0001515 | 0.0011716  | 0.0010728  |
| 2    | 9    | 0.0001617                 | -0.0000015 | 0.0003601  | 0.0005203  |
| 2    | 4    | -0.0000803                | -0.0000613 | 0.0005310  | 0.0003894  |
| 2    | 8    | 0.0002193                 | -0.0000005 | -0.0002875 | -0.0000687 |
| 2    | 3    | -0.0000613                | -0.0000111 | 0.0000888  | 0.0000164  |
| 2    | 2    | -0.0001509                | -0.0000005 | 0.0001971  | 0.0000457  |
| 2    | 1    | -0.0000582                | -0.0000009 | -0.0000398 | -0.0000989 |
| 2    | 2    | -0.0000653                | -0.0000003 | -0.0001410 | -0.0002066 |
| 3    | 6    | 0.0001317                 | -0.0002485 | 0.0005018  | 0.0003851  |
| 3    | 5    | 0.0001394                 | -0.0000647 | 0.0010335  | 0.0011083  |
| 3    | 9    | 0.0002802                 | -0.0000071 | 0.0003483  | 0.0006214  |
| 3    | 4    | -0.0002436                | -0.0000278 | 0.0006526  | 0.0003813  |
| 3    | 8    | -0.0002574                | -0.0000148 | -0.0000596 | -0.0003318 |
| 3    | 3    | 0.0006269                 | 0.0000000  | 0.0001594  | 0.0007863  |
| 3    | 2    | -0.0006059                | -0.0000012 | 0.0001471  | -0.0004600 |
| 3    | 1    | -0.0000244                | -0.0000001 | -0.0000824 | -0.0001070 |
| 3    | 2    | -0.0000185                | -0.0000003 | -0.0001456 | -0.0001645 |

**Table S.IX** Relevant Coriolis zeta parameters calculated at CCSD(T, fc)/cc-pVTZ

| AXIS IXYZ = 1 |      |               | AXIS IXYZ = 2 |      |               | AXIS IXYZ = 3 |      |               |
|---------------|------|---------------|---------------|------|---------------|---------------|------|---------------|
| Mode          | Mode |               | Mode          | Mode |               | Mode          | Mode |               |
| 9             | 6    | -0.1514069691 | 9             | 6    | 0.0273250867  | 5             | 6    | 0.4179692900  |
| 9             | 5    | 0.2230344525  | 9             | 5    | 0.2794872128  | 3             | 6    | 0.5181496698  |
| 4             | 9    | 0.2712049037  | 4             | 9    | -0.2694461085 | 3             | 5    | -0.7390610873 |
| 8             | 6    | -0.0762665744 | 8             | 6    | -0.1294131901 | 8             | 9    | 0.7638030029  |
| 8             | 5    | 0.0848954585  | 8             | 5    | 0.1361463837  | 3             | 6    | -0.1201681467 |
| 8             | 4    | -0.1824742238 | 8             | 4    | 0.1752049031  | 3             | 5    | 0.0267860316  |
| 3             | 9    | 0.0283308217  | 3             | 9    | -0.3464402926 | 3             | 4    | 0.0777610100  |
| 3             | 8    | 0.0099013600  | 3             | 8    | -0.2640890117 | 2             | 6    | -0.0509073344 |
| 2             | 9    | -0.0181092187 | 2             | 9    | -0.3225510683 | 2             | 5    | 0.0056433779  |
| 2             | 8    | -0.1006972682 | 2             | 8    | 0.4509035457  | 2             | 4    | -0.0469441478 |
| 1             | 9    | -0.7817592984 | 1             | 9    | -0.4377085744 | 2             | 3    | -0.8183557206 |
| 1             | 8    | -0.4395112754 | 1             | 8    | 0.6957255389  | 1             | 6    | 0.0334270204  |
| 7             | 6    | -0.0034796050 | 7             | 6    | 0.0458482609  | 1             | 5    | -0.0010706045 |
| 7             | 5    | 0.0560361492  | 7             | 5    | 0.0102919601  | 1             | 4    | 0.0714910001  |
| 7             | 4    | -0.0197255993 | 7             | 4    | 0.1054910912  | 1             | 3    | 0.5424829577  |
| 7             | 3    | 0.1000507755  | 7             | 3    | 0.8469777030  | 1             | 2    | 0.1198172549  |
| 7             | 2    | -0.9886181678 | 7             | 2    | 0.0426188754  | 7             | 9    | -0.1986545460 |
| 7             | 1    | 0.0528686981  | 7             | 1    | 0.0012510264  | 7             | 8    | 0.4733885638  |

**Table S.X** Relevant Coriolis zeta parameters calculated at CCSD(T, fc)/aug-cc-pVTZ

| AXIS IXYZ = 1 |      |               | AXIS IXYZ = 2 |      |               | AXIS IXYZ = 3 |      |               |
|---------------|------|---------------|---------------|------|---------------|---------------|------|---------------|
| Mode          | Mode |               | Mode          | Mode |               | Mode          | Mode |               |
| 9             | 6    | -0.1528675542 | 9             | 6    | 0.0242628742  | 5             | 6    | 0.4233679620  |
| 9             | 5    | 0.2214384874  | 9             | 5    | 0.2862297406  | 3             | 6    | 0.5138817217  |
| 4             | 9    | 0.2767024628  | 4             | 9    | -0.2758206528 | 3             | 5    | -0.7375321409 |
| 8             | 6    | -0.0725934001 | 8             | 6    | -0.1308509178 | 8             | 9    | 0.7657170872  |
| 8             | 5    | 0.0773187406  | 8             | 5    | 0.1312629794  | 3             | 6    | -0.1291451966 |
| 8             | 4    | -0.1758188458 | 8             | 4    | 0.1640180639  | 3             | 5    | 0.0344661712  |
| 3             | 9    | 0.0293129050  | 3             | 9    | -0.3639243460 | 3             | 4    | 0.0796180605  |
| 3             | 8    | 0.0041720091  | 3             | 8    | -0.2258283692 | 2             | 6    | -0.0492446553 |
| 2             | 9    | -0.0223907061 | 2             | 9    | -0.2861349274 | 2             | 5    | 0.0078214882  |
| 2             | 8    | -0.1053307206 | 2             | 8    | 0.4707934689  | 2             | 4    | -0.0594464382 |
| 1             | 9    | -0.7918607973 | 1             | 9    | -0.4246691735 | 2             | 3    | -0.8192577491 |
| 1             | 8    | -0.4221517365 | 1             | 8    | 0.7066206180  | 1             | 6    | 0.0324795340  |
| 7             | 6    | -0.0039057486 | 7             | 6    | 0.0446202333  | 1             | 5    | 0.0021701468  |
| 7             | 5    | 0.0551435041  | 7             | 5    | 0.0155825545  | 1             | 4    | 0.0772008500  |
| 7             | 4    | -0.0312265008 | 7             | 4    | 0.1131661385  | 1             | 3    | 0.5441700214  |
| 7             | 3    | 0.0421708963  | 7             | 3    | 0.8488970737  | 1             | 2    | 0.0904548966  |
| 7             | 2    | -0.9922748819 | 7             | 2    | -0.0096849169 | 7             | 9    | -0.1839905543 |
| 7             | 1    | 0.0519604102  | 9             | 1    | 0.0015568157  | 7             | 8    | 0.4764689173  |

**Table S.XI** Relevant Coriolis zeta parameters calculated at CCSD(T, fc)/cc-pVQZ

| AXIS IXYZ = 1 |      |               | AXIS IXYZ = 2 |      |               | AXIS IXYZ = 3 |      |               |
|---------------|------|---------------|---------------|------|---------------|---------------|------|---------------|
| Mode          | Mode |               | Mode          | Mode |               | Mode          | Mode |               |
| 9             | 6    | -0.1523582252 | 9             | 6    | 0.0258718945  | 5             | 6    | 0.4220794245  |
| 9             | 5    | 0.2216543495  | 9             | 5    | 0.2828275982  | 3             | 6    | 0.5158489911  |
| 4             | 9    | 0.2745104559  | 4             | 9    | -0.2733509095 | 3             | 5    | -0.7372986603 |
| 8             | 6    | -0.0749743928 | 8             | 6    | -0.1307334939 | 8             | 9    | 0.7643064026  |
| 8             | 5    | 0.0812914966  | 8             | 5    | 0.1346404129  | 3             | 6    | -0.1250846536 |
| 8             | 4    | -0.1802420111 | 8             | 4    | 0.1701567017  | 3             | 5    | 0.0316604904  |
| 3             | 9    | 0.0288463341  | 3             | 9    | -0.3523853019 | 3             | 4    | 0.0819636767  |
| 3             | 8    | 0.0077561118  | 3             | 8    | -0.2496319306 | 2             | 6    | -0.0517108913 |
| 2             | 9    | -0.0209719554 | 2             | 9    | -0.3082573013 | 2             | 5    | 0.0096661177  |
| 2             | 8    | -0.1041173827 | 2             | 8    | 0.4598787165  | 2             | 4    | -0.0539834126 |
| 1             | 9    | -0.7853361787 | 1             | 9    | -0.4332234507 | 2             | 3    | -0.8177440302 |
| 1             | 8    | -0.4327252161 | 1             | 8    | 0.6990753885  | 1             | 6    | 0.0329084396  |
| 7             | 6    | -0.0041335237 | 7             | 6    | 0.0449893329  | 1             | 5    | -0.0002133760 |
| 7             | 5    | 0.0560619665  | 7             | 5    | 0.0120988196  | 1             | 4    | 0.0761233489  |
| 7             | 4    | -0.0275748142 | 7             | 4    | 0.1115555038  | 1             | 3    | 0.5436044222  |
| 7             | 3    | 0.0778943995  | 7             | 3    | 0.8476996209  | 1             | 2    | 0.1095552873  |
| 7             | 2    | -0.9902283948 | 7             | 2    | 0.0217610583  | 7             | 9    | -0.1926672020 |
| 7             | 1    | 0.0532165965  | 7             | 1    | 0.0021379529  | 7             | 8    | 0.4749165699  |

**Table S.XII** Relevant Coriolis zeta parameters calculated at CCSD(T, fc)/cc-pCVTZ

| AXIS IXYZ = 1 |      |               | AXIS IXYZ = 2 |      |               | AXIS IXYZ = 3 |      |               |
|---------------|------|---------------|---------------|------|---------------|---------------|------|---------------|
| Mode          | Mode |               | Mode          | Mode |               | Mode          | Mode |               |
| 9             | 6    | -0.1519127158 | 9             | 6    | 0.0273775545  | 5             | 6    | 0.4187393940  |
| 9             | 5    | 0.2234971643  | 9             | 5    | 0.2797096924  | 3             | 6    | 0.5183266366  |
| 4             | 9    | 0.2716606084  | 4             | 9    | -0.2702501506 | 3             | 5    | -0.7384716648 |
| 8             | 6    | -0.0762010349 | 8             | 6    | -0.1295107449 | 8             | 9    | 0.7632578686  |
| 8             | 5    | 0.0845753846  | 8             | 5    | 0.1354833467  | 3             | 6    | -0.1201718144 |
| 8             | 4    | -0.1819989538 | 8             | 4    | 0.1745326450  | 3             | 5    | 0.0264792936  |
| 3             | 9    | 0.0288627901  | 3             | 9    | -0.3488467356 | 3             | 4    | 0.0790819075  |
| 3             | 8    | 0.0097793936  | 3             | 8    | -0.2620459144 | 2             | 6    | -0.0509065479 |
| 2             | 9    | -0.0184061297 | 2             | 9    | -0.3202293990 | 2             | 5    | 0.0068130822  |
| 2             | 8    | -0.1014068835 | 2             | 8    | 0.4533595496  | 2             | 4    | -0.0469969131 |
| 1             | 9    | -0.7823473294 | 1             | 9    | -0.4366248271 | 2             | 3    | -0.8177475924 |
| 1             | 8    | -0.4379479092 | 1             | 8    | 0.6958599555  | 1             | 6    | 0.0334443981  |
| 7             | 6    | -0.0035931776 | 7             | 6    | 0.0456561938  | 1             | 5    | -0.0014918574 |
| 7             | 5    | 0.0559141598  | 7             | 5    | 0.0099031857  | 1             | 4    | 0.0716123884  |
| 7             | 4    | -0.0209889316 | 7             | 4    | 0.1052964726  | 1             | 3    | 0.5436065057  |
| 7             | 3    | 0.0957444490  | 7             | 3    | 0.8467859110  | 1             | 2    | 0.1180813356  |
| 7             | 2    | -0.9889789407 | 7             | 2    | 0.0383891847  | 7             | 9    | -0.1977867380 |
| 7             | 1    | 0.0528522616  | 7             | 1    | 0.0014972922  | 7             | 8    | 0.4745614757  |

**Table S.XIII** Relevant Coriolis zeta parameters calculated at CCSD(T, all)/cc-pCVTZ

| AXIS IXYZ = 1 |      |               | AXIS IXYZ = 2 |      |               | AXIS IXYZ = 3 |      |               |
|---------------|------|---------------|---------------|------|---------------|---------------|------|---------------|
| Mode          | Mode |               | Mode          | Mode |               | Mode          | Mode |               |
| 9             | 6\   | -0.1557218487 | 9             | 6    | 0.0238718992  | 5             | 6    | 0.4270403845  |
| 9             | 5    | 0.2189683849  | 9             | 5    | 0.2820708108  | 3             | 6    | 0.5265259266  |
| 4             | 9    | 0.2722044541  | 4             | 9    | -0.2775022446 | 3             | 5    | -0.7256333453 |
| 8             | 6    | -0.0745636550 | 8             | 6    | -0.1301663489 | 8             | 9    | 0.7634495264  |
| 8             | 5    | 0.0771304780  | 8             | 5    | 0.1299150666  | 3             | 6    | -0.1309898369 |
| 8             | 4    | -0.1751511567 | 8             | 4    | 0.1655759167  | 3             | 5    | 0.0334028087  |
| 3             | 9    | 0.0283600830  | 3             | 9    | -0.3534188807 | 3             | 4    | 0.0876970420  |
| 3             | 8    | 0.0081039254  | 3             | 8    | -0.2533247799 | 2             | 6    | -0.0588529244 |
| 2             | 9    | -0.0168120696 | 2             | 9    | -0.3064836144 | 2             | 5    | 0.0103171365  |
| 2             | 8    | -0.1025811465 | 2             | 8    | 0.4592187853  | 2             | 4    | -0.0574488758 |
| 1             | 9    | -0.7912621831 | 1             | 9    | -0.4277341604 | 2             | 3    | -0.8175356827 |
| 1             | 8    | -0.4272486498 | 1             | 8    | 0.7036383270  | 1             | 6    | 0.0342735538  |
| 7             | 6    | -0.0045121938 | 7             | 6    | 0.0463548448  | 1             | 5    | 0.0025393397  |
| 7             | 5    | 0.0574686036  | 7             | 5    | 0.0172685327  | 1             | 4    | 0.0800502339  |
| 7             | 4    | -0.0348406814 | 7             | 4    | 0.1165733344  | 1             | 3    | 0.5400308824  |
| 7             | 3    | 0.0916513752  | 7             | 3    | 0.8432360830  | 1             | 2    | 0.1159342750  |
| 7             | 2    | -0.9890593500 | 7             | 2    | 0.0314119748  | 7             | 9    | -0.1902866423 |
| 7             | 1    | 0.0450924686  | 7             | 1    | 0.0008221168  | 7             | 8    | 0.4818064735  |
